CORRECTION

# Correction: Suppression of USP18 Potentiates the Anti-HBV Activity of Interferon Alpha in HepG2.2.15 Cells via JAK/STAT Signaling

Lin Li, Qing-song Lei, Shu-Jun Zhang, Ling-na Kong, Bo Qin

## Notice of Republication

This article was republished on June 23, 2016, to correct errors introduced while preparing the manuscript for publication. IFN- $\alpha$  appeared incorrectly throughout the article. Please download this article again to view the correct version. The originally published, uncorrected article and the republished, corrected article are provided here for reference.

## Supporting Information

**S1 File. Originally published, uncorrected article.**  
(PDF)

**S2 File. Republished, corrected article.**  
(PDF)

## Reference

1. Li L, Lei Q-s, Zhang S-J, Kong L-n, Qin B (2016) Suppression of USP18 Potentiates the Anti-HBV Activity of Interferon Alpha in HepG2.2.15 Cells via JAK/STAT Signaling. PLoS ONE 11(5): e0156496. doi: [10.1371/journal.pone.0156496](https://doi.org/10.1371/journal.pone.0156496) PMID: [27227879](https://pubmed.ncbi.nlm.nih.gov/27227879/)

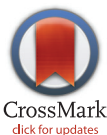

## OPEN ACCESS

**Citation:** Li L, Lei Q-s, Zhang S-J, Kong L-n, Qin B (2016) Correction: Suppression of USP18 Potentiates the Anti-HBV Activity of Interferon Alpha in HepG2.2.15 Cells via JAK/STAT Signaling. PLoS ONE 11(7): e0159019. doi:10.1371/journal.pone.0159019

**Published:** July 5, 2016

**Copyright:** © 2016 Li et al. This is an open access article distributed under the terms of the [Creative Commons Attribution License](https://creativecommons.org/licenses/by/4.0/), which permits unrestricted use, distribution, and reproduction in any medium, provided the original author and source are credited.
